# Supplementary material
Source: PubMed Central journal article supplement (PMC3335951)
Supplement: epi0703_0278SD1.pdf [file epi0703_0278SD1.pdf]

Supplemental material to:

Christopher J. Ricketts, Mark R. Morris, Dean Gentle, Michael Brown, Naomi Wake,  
Emma R. Woodward, Noel Clarke, Farida Latif and Eamonn R. Maher.

Epigenetics 2012; 7(3). <http://dx.doi.org/10.4161/epi.7.3.19103>

<http://www.landesbioscience.com/journals/epigenetics/article/19103>

## Supplementary Material

### Supplementary Figure 1: Comparison Graphs of Infinium HumanMethylation27 array total probe $\beta$ -values.

A - An experimental replicate demonstrating high repeatability between HumanMethylation27 arrays with a correlation co-efficient of  $R^2 = 0.9955$ ; B and C – Comparison of methylation scores from normal kidney samples; D, E and F – Comparison of methylation scores in paired normal and renal cancer samples demonstrating large amounts of both aberrant hypermethylation and hypomethylation in the cancer samples resulting in low levels of correlation with the normal kidney samples.

### Supplementary Figure 2: Methylation levels within Normal Kidney Controls related to Age

These lists demonstrate the number of Infinium Probes/Genes either methylated in normal kidney samples aged >60 years but unmethylated in normal kidney samples aged <45 years or methylated in normal kidney samples aged <45 years but unmethylated in normal kidney samples aged >60.

### Supplementary Figure 3: Schematic Diagram of the Gene Selection Process and the Selected Genes

The flow diagram demonstrates the selection criteria and the number of selected probes/genes. The X chromosome genes and imprinted genes were removed along with the probes for which one or more normal kidney samples were methylated. The functional analysis selection of the *combined analysis* list was performed using the Database for Annotation, Visualization and Integrated Discovery (DAVID) software (<http://david.abcc.ncifcrf.gov/>) and the Ingenuity® Systems Pathway Analysis Software (<http://www.ingenuity.com/>).

#### **Supplementary Figure 4: *Methylation only* Methylated Probes**

This demonstrates which tumours were methylated (red dots represent methylation) for which of the 60 probes selected by the *methylation only* criteria. The distance to transcription start site was provided by Illumina annotation and does not differentiate between upstream or downstream distance. All probes were deemed to be within “true” CpG islands in accordance with an Illumina algorithm.

#### **Supplementary Figure 5: Gene Selection Breakdown**

The Venn diagrams show the number of genes selected by either criteria for the *methylation only* selection (A) and the *combined analysis* selection (B) and the number of genes that satisfied both criteria.

#### **Supplementary Figure 6: *Methylation only* Genes with Multiple Methylated Probes**

This demonstrates which tumours were methylated (red dots represent methylation) for each of the genes with multiple probes selected by the *methylation only* criteria and level of concordance between the methylation seen between two probes for the same genes CpG island. The multiple probes were mapped to the CpG islands and the first exon of the gene to demonstrate their distance apart.

#### **Supplementary Figure 7: CoBRA Confirmation of $\beta$ -values**

A – Examples of CoBRA showing methylation in the assessed tumours with high  $\beta$ -values for *OVOL1* and *DLEC1* (U = undigested, D = digested) with no methylation in normal kidney samples.

B – *FBN2*, a recently identified gene methylated in kidney cancer and present within the high stringency list demonstrated methylation in the assessed tumours with high  $\beta$ -values (U = undigested, D = digested). The Infinium primer set (surrounding the Infinium probe) and the MeDIP primer set

(from the previous study) demonstrated strong, but not perfect, correlation and their positions were mapped against the CpG island. Neither primer sets showed methylation in normal kidney samples.

**Supplementary Figure 8: HumanMethylation27 array  $\beta$ -values for genes identified by previous MeDIP study**

This figure shows the HumanMethylation27 array  $\beta$ -values and Difference values (tumour probe  $\beta$ -value – average normal kidney  $\beta$ -value) for genes identified by a previous MeDIP study<sup>23</sup>. Probes shaded dark grey demonstrate high levels of normal methylation and light grey demonstrate levels of methylation in the normals only slightly above accepted levels. The percentage of methylation is shown for each level of selection criteria.

**Supplementary Figure 9: Multiple comparison analysis for clustered probe groups**

A - Multiple comparison graph of the average  $\beta$ -value for selected genes for clustered groups using the average *methylation only* probe  $\beta$ -values.

B - Student-Newman-Keuls test for all pairwise comparisons for the clustered groups using the average *methylation only* probe  $\beta$ -values.

**Supplementary Figure 10: mRNA Analysis of Methylation of *DLEC1*, *TMPRSS2* and *BMP4***

Demonstrates the loss or depletion of each methylated genes mRNA in tumour/associated normal (T/N) mRNA pairs (numbered 1-15).



# Supplementary Figure 1

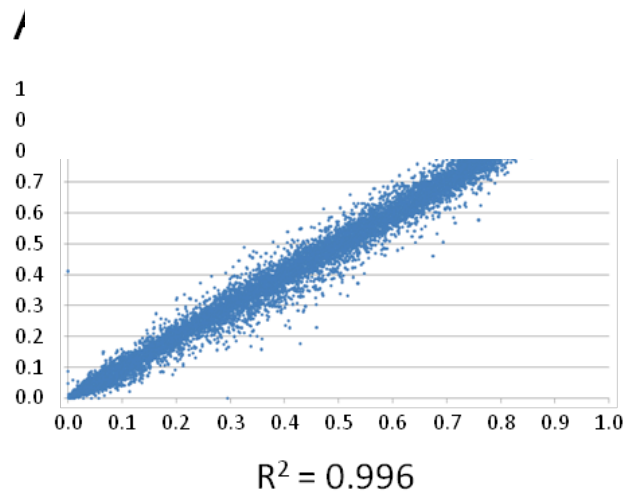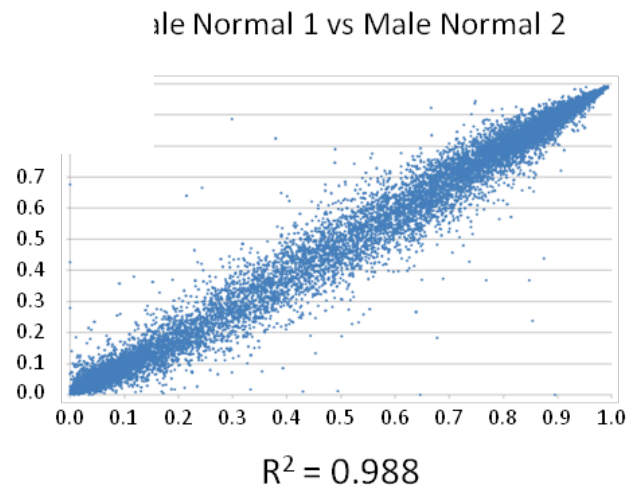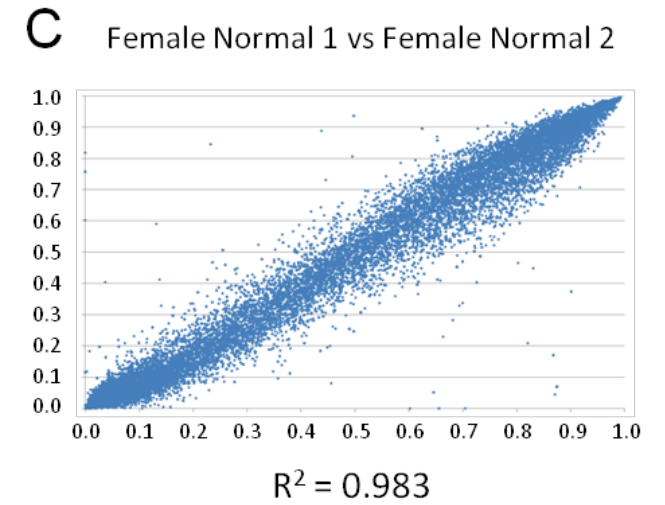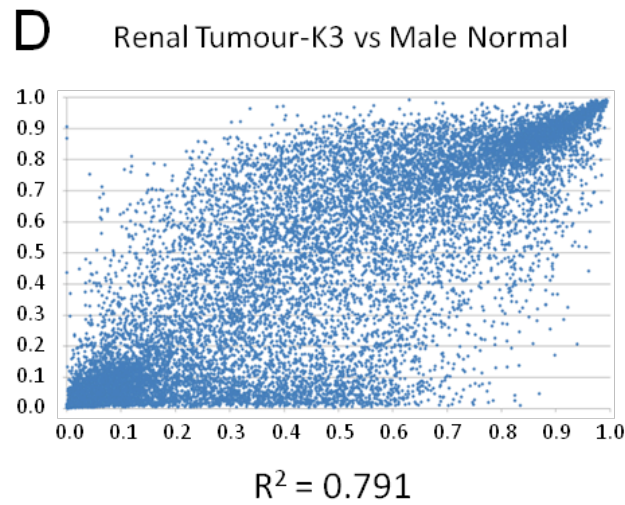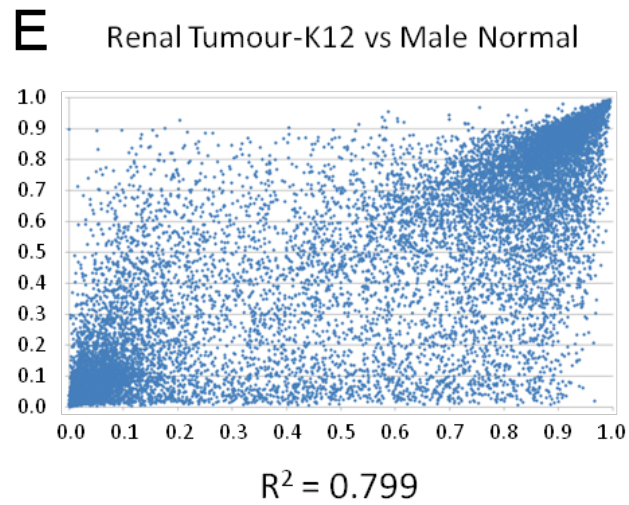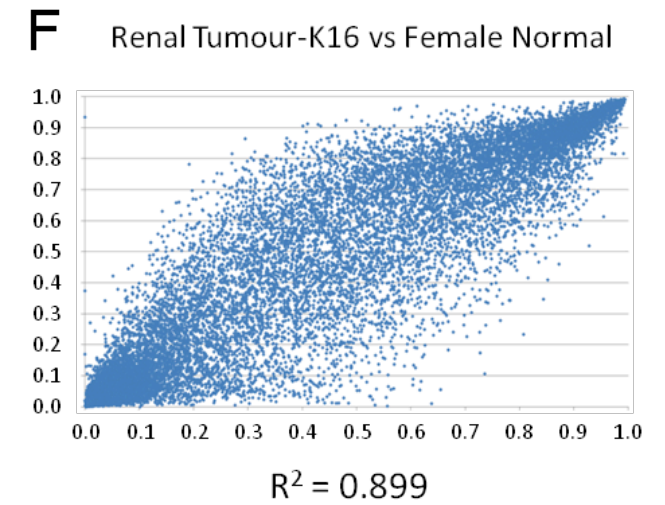

# Supplementary Figure 2

Infinium Probes/Genes  
methylated in normal kidney  
samples aged <45 years but  
unmethylated in normal kidney  
samples aged <60 years

| Gene              | Infinium Probe   | Gene            |
|-------------------|------------------|-----------------|
|                   | cg14982472       | ABCG1           |
|                   | cg18353563       | ABTB1           |
|                   | cg25072179       | AGTRL1          |
|                   | cg25375764       | ALDH5A1         |
|                   | cg02002676       | APOBEC3B        |
|                   | cg26022401       | APOBEC3G        |
|                   | cg19220825       | AQP5            |
|                   | cg09527362       | C6orf150        |
|                   | cg11207564       | CCL3L3          |
|                   | cg14754581       | CCRL2           |
|                   | cg23654549       | CD24            |
|                   | cg26239233       | CITA            |
|                   | cg24910675       | ENG             |
|                   | cg27105123       | EPS8L1          |
|                   | cg01600189       | FUJ20444        |
|                   | cg17518962       | GAL3ST4         |
|                   | cg03852144       | GLRX            |
|                   | cg23244913       | HCG9            |
|                   | cg16983211       | HOXC5           |
|                   | cg00187380       | HOXC5           |
|                   | cg24125648       | HYPK            |
|                   | cg07463059       | IFI16           |
|                   | cg18302652       | IL8             |
|                   | cg16468729       | IL8             |
|                   | cg07638935       | KAZALD1         |
|                   | cg00630164       | KCNQ4           |
|                   | cg10737521       | KIAA0676        |
|                   | cg13697387       | LCE2A           |
|                   | cg13079059       | LENG9           |
|                   | cg10261589       | LOC133308       |
|                   | cg24046474       | LRSAM1          |
|                   | cg17169998       | MLC1            |
|                   | cg08818984       | NR3C1           |
|                   | cg08750326       | ODZ1            |
|                   | cg07211259       | PDCC1LG2        |
|                   | cg27208307       | PRG1            |
|                   | cg05628549       | PRKCDBP         |
|                   | cg16245261       | PRKCDBP         |
|                   | cg13035743       | PRRT1           |
|                   | cg02397720       | RAB17           |
|                   | cg08822227       | SH3BP2          |
|                   | cg06836849       | SLC17A8         |
|                   | cg17339202       | SYNC1           |
|                   | cg20955688       | TMEM71          |
|                   | cg08341874       | VMO1            |
|                   | cg17836145       | VNN2            |
|                   | <b>46 Probes</b> | <b>43 Genes</b> |
| cg21995126        | BCH2             |                 |
| cg03400060        | BHMT2            |                 |
| cg16779976        | BLNK             |                 |
| cg21043558        | BRAF             |                 |
| cg08775230        | C11orf52         |                 |
| cg16512727        | C12orf4          |                 |
| cg20022541        | C14orf152        |                 |
| cg18490846        | C17orf73         |                 |
| cg04245402        | C19orf21         |                 |
| cg18919097        | C3orf57          |                 |
| cg01126560        | C9orf142         |                 |
| cg24505341        | CADPS            |                 |
| cg24202119        | CAPSL            |                 |
| cg20099806        | CCDC47           |                 |
| cg20537992        | CDC45            |                 |
| cg24765079        | CDH1             |                 |
| cg06268694        | CELSR1           |                 |
| cg17387870        | CHFR             |                 |
| cg07066326        | CHID1            |                 |
| cg27190239        | CLEC2A           |                 |
| cg08015496        | COPA             |                 |
| cg20938689        | COX7C            |                 |
| cg03032025        | CPEB4            |                 |
| cg14404298        | CYP8B1           |                 |
| cg24754277        | DAPK1            |                 |
| cg24292612        | DEFB1            |                 |
| cg22772878        | DIRAS1           |                 |
| cg10942056        | DISP1            |                 |
| cg09971646        | DLK1             |                 |
| cg21836062        | DMD              |                 |
| cg10674793        | DVL3             |                 |
| cg17703212        | DYDC1            |                 |
| cg16858125        | ELOVL1           |                 |
| cg18997129        | EPHA1            |                 |
| cg08575537        | EPO              |                 |
| cg25256723        | F5               |                 |
| cg21075829        | FAM62C           |                 |
| cg02729303        | FUJ20152         |                 |
| cg25370441        | FUJ20184         |                 |
| cg15967525        | FUJ20273         |                 |
| cg14851685        | FUJ39501         |                 |
| cg03782453        | FUJ90575         |                 |
| cg07147350        | FMR1             |                 |
| cg24058132        | GALC             |                 |
| cg13434842        | GATA4            |                 |
| cg20125091        | GF11             |                 |
| cg22459146        | GHSR             |                 |
| cg11054936        | GJB2             |                 |
| cg18344745        | GLRB             |                 |
| cg24747122        | GNA13            |                 |
| cg10862848        | GNMT             |                 |
| cg04700814        | HEXIM1           |                 |
| cg12866859        | HEXIM1           |                 |
| cg10212621        | HMGCS2           |                 |
| cg13176979        | HMGN3            |                 |
| cg18236734        | HTR3E            |                 |
| cg20977864        | HYDIN            |                 |
| cg09152089        | IL22RA1          |                 |
| cg00995520        | KCNA3            |                 |
| cg27409364        | KCN C1           |                 |
| cg09835085        | KCNE4            |                 |
| cg04439215        | KCTD4            |                 |
| cg10150813        | KIAA0746         |                 |
| cg16034652        | KIAA1409         |                 |
| cg02838492        | KIF12            |                 |
| cg18087514        | KMO              |                 |
| cg00616135        | LACTB            |                 |
| cg25947945        | LAD1             |                 |
| cg01919208        | LAMB2            |                 |
| cg13689073        | LARP1            |                 |
| cg16944093        | LIMS2            |                 |
| cg15703357        | LINCR            |                 |
| cg15660498        | LOC148137        |                 |
| cg17906786        | LOC400120        |                 |
| cg02838877        | MBNL2            |                 |
| cg02037013        | MC4R             |                 |
| cg06959635        | MCF2             |                 |
| cg02994956        | NEFH             |                 |
| cg12978308        | NEIL1            |                 |
| cg02196655        | NOL10            |                 |
| cg23896545        | NOMO1            |                 |
| cg22134325        | NPAS4            |                 |
| cg24194775        | NPR2             |                 |
| cg03958979        | NR2E1            |                 |
| cg15572745        | NRXN3            |                 |
| cg26145228        | NTNG1            |                 |
| cg08409225        | OBFC2B           |                 |
| cg24812103        | PABPC1           |                 |
| cg15662251        | PAQR7            |                 |
| cg22468055        | PARP15           |                 |
| cg24401441        | PAX1             |                 |
| cg18096388        | PDCD1            |                 |
| cg12435792        | PDE6B            |                 |
| cg10098541        | PDI A5           |                 |
| cg27182761        | PHLDA1           |                 |
| cg05947740        | PHYHIP           |                 |
| cg27324619        | PIB5PA           |                 |
| cg02105856        | PIGR             |                 |
| cg22968401        | PIPOX            |                 |
| cg04818845        | PLEKHG5          |                 |
| cg07059360        | POLR3D           |                 |
| cg17791651        | POU3F1           |                 |
| cg11164400        | PPP1R9A          |                 |
| cg01112778        | PPP2R2B          |                 |
| cg16196812        | PRLHR            |                 |
| cg12555334        | PSPH             |                 |
| cg16177163        | PTDSS1           |                 |
| cg15379633        | RAB36            |                 |
| cg02525756        | RAB42            |                 |
| cg02417264        | RAMP3            |                 |
| cg03996822        | RASSF6           |                 |
| cg11719297        | RIPK4            |                 |
| cg24835159        | RNF43            |                 |
| cg02671171        | RP33AL           |                 |
| cg00689340        | RTKN             |                 |
| cg26614073        | SCAP             |                 |
| cg16986846        | SCGB2A1          |                 |
| cg11928198        | SCNM1            |                 |
| cg13302823        | SCRT1            |                 |
| cg22752533        | SLC12A5          |                 |
| cg09494546        | SLC16A4          |                 |
| cg02641676        | SLC20A2          |                 |
| cg08999895        | SLC22A18A5       |                 |
| cg07845392        | SLC25A10         |                 |
| cg09548084        | SLC35B3          |                 |
| cg20804101        | SLC6A13          |                 |
| cg05467458        | SLC7A9           |                 |
| cg12842316        | SLITRK4          |                 |
| cg00002426        | SLMAP            |                 |
| cg24132694        | SNAPC2           |                 |
| cg06675478        | SOX1             |                 |
| cg26531804        | SPINT1           |                 |
| cg05517572        | STAP2            |                 |
| cg11822772        | SUHW3            |                 |
| cg23950724        | SYT10            |                 |
| cg12958778        | TBC1D14          |                 |
| cg16175725        | TCF1             |                 |
| cg09558850        | TFPI2            |                 |
| cg27090087        | TINAG            |                 |
| cg03109701        | TMEM118          |                 |
| cg00687674        | TMEM84           |                 |
| cg13486556        | TMOD2            |                 |
| cg12603560        | TNKS1BP1         |                 |
| cg27210390        | TOM1L1           |                 |
| cg23322523        | TRIM55           |                 |
| cg27032184        | TRMU             |                 |
| cg04975920        | TSPAN1           |                 |
| cg18735146        | TTC10            |                 |
| cg02905245        | URB              |                 |
| cg01211097        | USP10            |                 |
| cg22980351        | WDR40B           |                 |
| cg13674559        | WDR44            |                 |
| cg06330621        | ZCCHC14          |                 |
| cg25766774        | ZDHHC3           |                 |
| cg18793806        | ZNF514           |                 |
| <b>171 Probes</b> | <b>168 Genes</b> |                 |

## Supplementary Figure 3

### Methylation27 BeadChip

Probes for 14,475 genes

in renal cell carcinoma (RCC) and 9 normal kidney samples

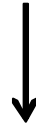

Probes with 1 or more normals with  $\beta$ -values = 0.25 were removed

Average  $\beta$ -values were calculated for the normal kidney samples

Difference values for each tumour were calculated as the  $\beta$ -value minus the average  $\beta$ -value

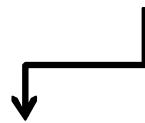

### *Methylation only Selection*

Selected all probes for which 7 or more RCC samples meet either of the following criteria:

- $\beta$ -values = 0.5  
(43 Probes – 42 Genes)
- Difference values = 0.4  
(48 Probes – 44 Genes)

Combined Selection =  
60 Probes for 55 Genes

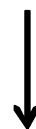

### Genes selected for Analysis

- Top three methylated genes:  
FOXL1    SLC34A2  
TM6SF1
- Genes with 2 selected probes:  
COL1A2    OVOL1  
SOCS2    TNFRSF10C  
ZNF154
- Genes selected by functional candidacy:  
TMPRSS2  
DLEC1

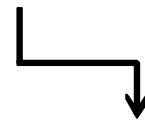

### *Combined analysis Selection*

Selected all probes for which 7 or more RCC samples meet either of the following criteria:

- $\beta$ -values = 0.4  
(Probes 179 – Genes 166)
- Difference values = 0.3  
(Probes 178 – Genes 164)

Combined Selection =  
220 Probes for 205 Genes

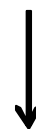

### Genes selected for Analysis

- Genes selected from DAVID Functional Analysis:  
BMP4  
SST  
CDKN2B
- Genes selected from Ingenuity<sup>®</sup> Systems Pathway Analysis:  
BMP4  
SST  
CDKN2B





Supplementary Figure 5

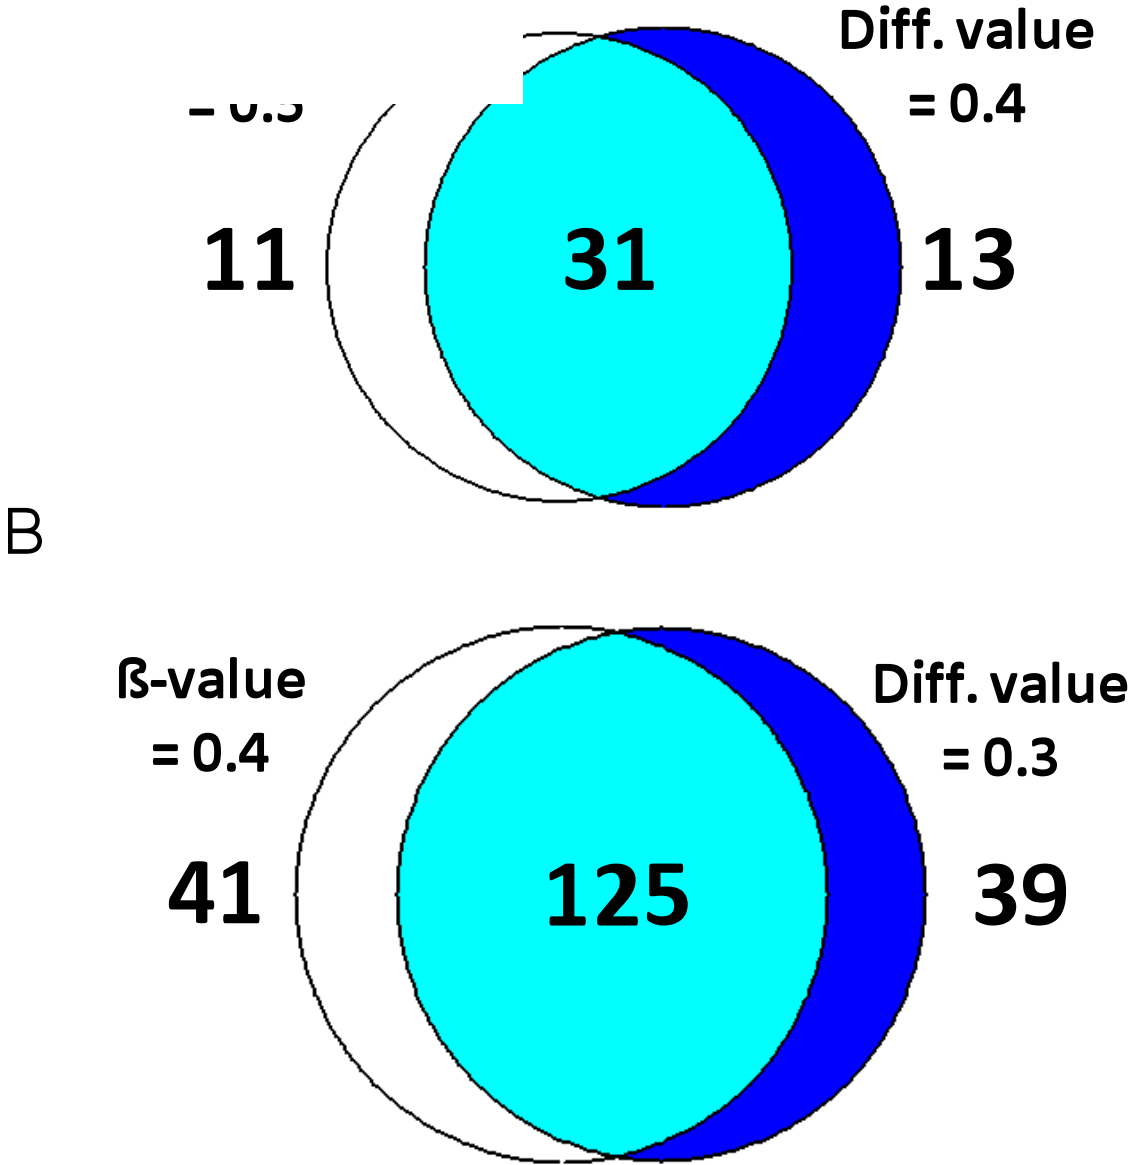

# Supplementary Figure 6

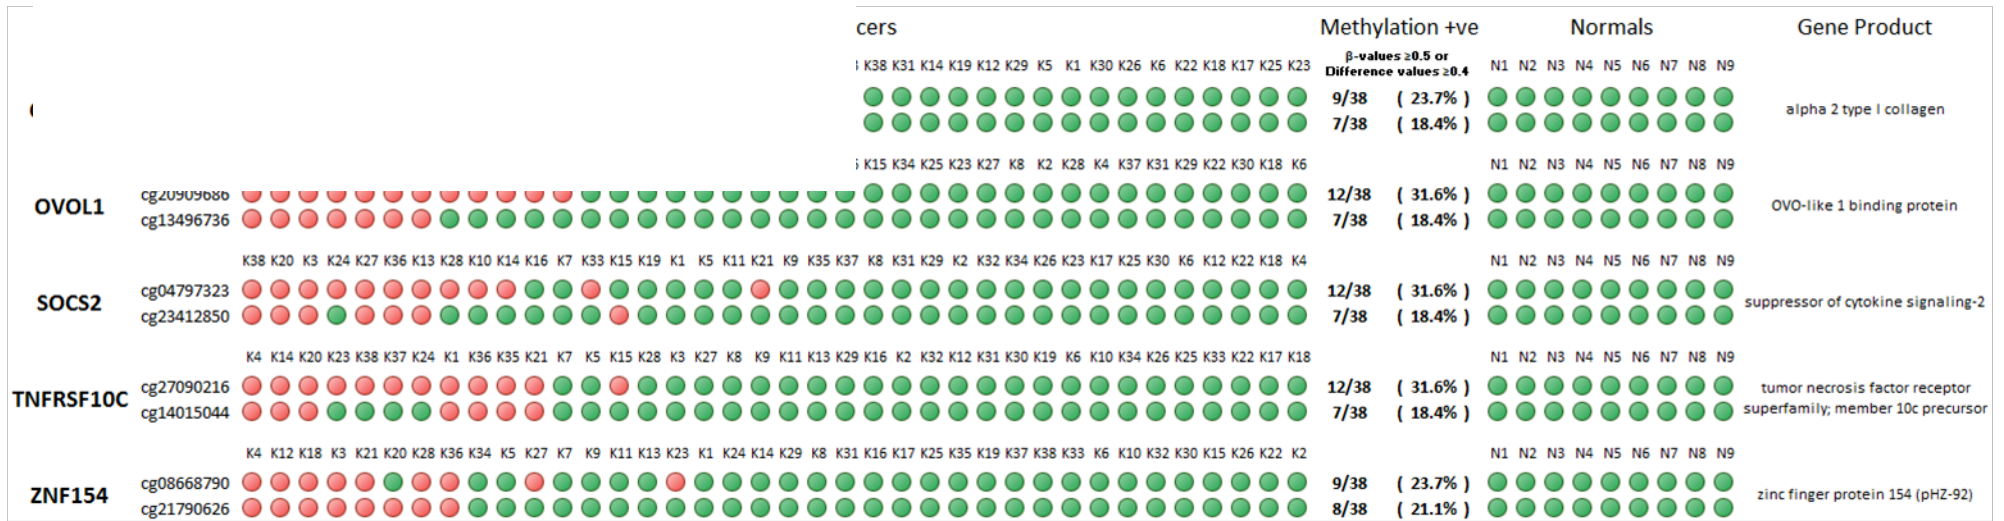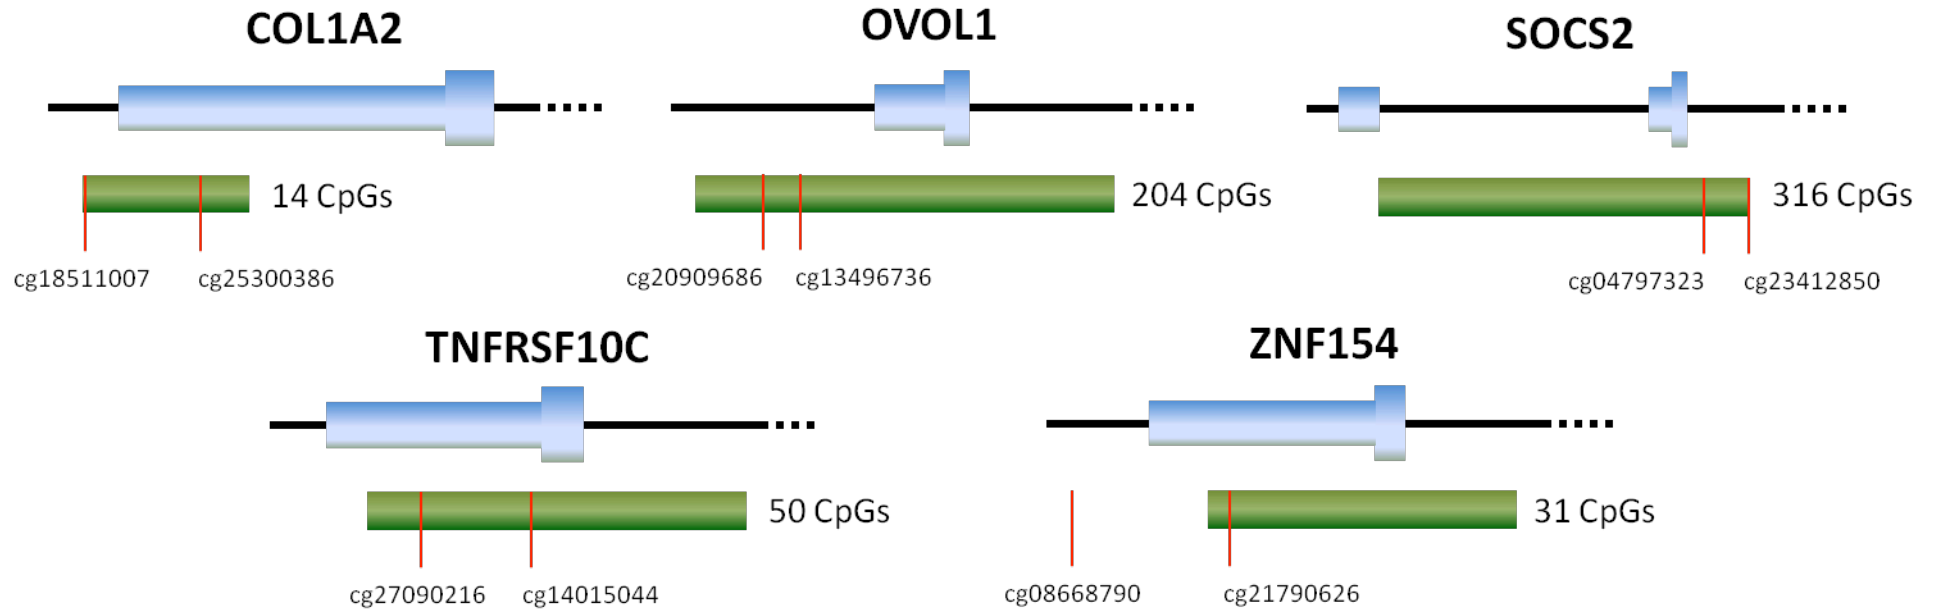





# Supplementary Figure 8

| SYMBOL   | y Samples |       |      |       |   |       |    |       |   |   | PRODUCT | DISTANCE TO TSS                                                                         | CPG ISLAND |      |
|----------|-----------|-------|------|-------|---|-------|----|-------|---|---|---------|-----------------------------------------------------------------------------------------|------------|------|
|          | an        |       | Mean |       |   |       |    |       |   |   |         |                                                                                         |            |      |
| ATP5G2   |           |       |      |       |   |       |    |       |   |   | 0.02    | ATP synthase; H+ transporting; mitochondrial F0 complex; subunit c isoform 2b precursor | 462        | TRUE |
| ATP5G2   |           |       |      |       |   |       |    |       |   |   | 0.05    | ATP synthase; H+ transporting; mitochondrial F0 complex; subunit c isoform 2b precursor | 51         | TRUE |
| CCDC8    |           |       |      |       |   |       |    |       |   |   | 0.73    | coiled-coil domain containing 8                                                         | 414        | TRUE |
| CCDC8    | 1         | 2.6%  | 6    | 15.8% | 3 | 7.9%  | 6  | 15.8% | 0 | 1 | 0.09    | coiled-coil domain containing 8                                                         | 321        | TRUE |
| CORO6    | 6         | 15.8% | 11   | 28.9% | 1 | 2.6%  | 4  | 10.5% | 3 | 9 | 0.24    | coronin 6                                                                               | 98         | TRUE |
| CORO6    | 1         | 2.6%  | 1    | 2.6%  | 1 | 2.6%  | 1  | 2.6%  | 0 | 1 | 0.07    | coronin 6                                                                               | 34         | TRUE |
| FBN2     | 8         | 21.1% | 10   | 26.3% | 5 | 13.2% | 9  | 23.7% | 0 | 9 | 0.17    | fibrillin 2 precursor                                                                   | 24         | TRUE |
| FBN2     | 4         | 10.5% | 13   | 34.2% | 3 | 7.9%  | 10 | 26.3% | 0 | 6 | 0.13    | fibrillin 2 precursor                                                                   | 1090       | TRUE |
| FLJ33790 | 0         | 0.0%  | 0    | 0.0%  | 0 | 0.0%  | 0  | 0.0%  | 0 | 0 | 0.02    | hypothetical protein LOC283212                                                          | 708        | TRUE |
| FLJ33790 | 34        | 89.5% | 34   | 89.5% | 1 | 2.6%  | 5  | 13.2% | 9 | 9 | 0.55    | hypothetical protein LOC283212                                                          | 426        | TRUE |
| PCDH8    | 0         | 0.0%  | 0    | 0.0%  | 0 | 0.0%  | 1  | 2.6%  | 0 | 1 | 0.06    | protocadherin 8 isoform 2 precursor                                                     | 1353       | TRUE |
| PCDH8    | 1         | 2.6%  | 7    | 18.4% | 1 | 2.6%  | 5  | 13.2% | 0 | 6 | 0.14    | protocadherin 8 isoform 2 precursor                                                     | 393        | TRUE |
| QPCT     | 0         | 0.0%  | 0    | 0.0%  | 0 | 0.0%  | 0  | 0.0%  | 0 | 0 | 0.06    | glutaminyl-peptide cyclotransferase precursor                                           | 699        | TRUE |
| SCUBE3   | 1         | 2.6%  | 3    | 7.9%  | 2 | 5.3%  | 4  | 10.5% | 0 | 0 | 0.05    | signal peptide; CUB domain; EGF-like 3                                                  | 318        | TRUE |
| SCUBE3   | 2         | 5.3%  | 3    | 7.9%  | 2 | 5.3%  | 4  | 10.5% | 0 | 1 | 0.05    | signal peptide; CUB domain; EGF-like 3                                                  | 789        | TRUE |
| SOX14    | 1         | 2.6%  | 3    | 7.9%  | 1 | 2.6%  | 2  | 5.3%  | 0 | 9 | 0.16    | SRY-box 14                                                                              | 117        | TRUE |
| SOX14    | 2         | 5.3%  | 4    | 10.5% | 2 | 5.3%  | 5  | 13.2% | 0 | 3 | 0.09    | SRY-box 14                                                                              | 100        | TRUE |
| SPINT2   | 0         | 0.0%  | 0    | 0.0%  | 0 | 0.0%  | 0  | 0.0%  | 0 | 1 | 0.09    | serine protease inhibitor; Kunitz type; 2                                               | 434        | TRUE |
| SPINT2   | 0         | 0.0%  | 0    | 0.0%  | 0 | 0.0%  | 1  | 2.6%  | 0 | 0 | 0.00    | serine protease inhibitor; Kunitz type; 2                                               | 85         | TRUE |
| ZNF447   | 0         | 0.0%  | 0    | 0.0%  | 0 | 0.0%  | 1  | 2.6%  | 0 | 0 | 0.01    | zinc finger protein 447                                                                 | 104        | TRUE |
| ZNF447   | 0         | 0.0%  | 0    | 0.0%  | 0 | 0.0%  | 2  | 5.3%  | 0 | 1 | 0.04    | zinc finger protein 447                                                                 | 229        | TRUE |



# Supplementary Figure 9

A

graph of the average  $\beta$ -value for es for clustered groups

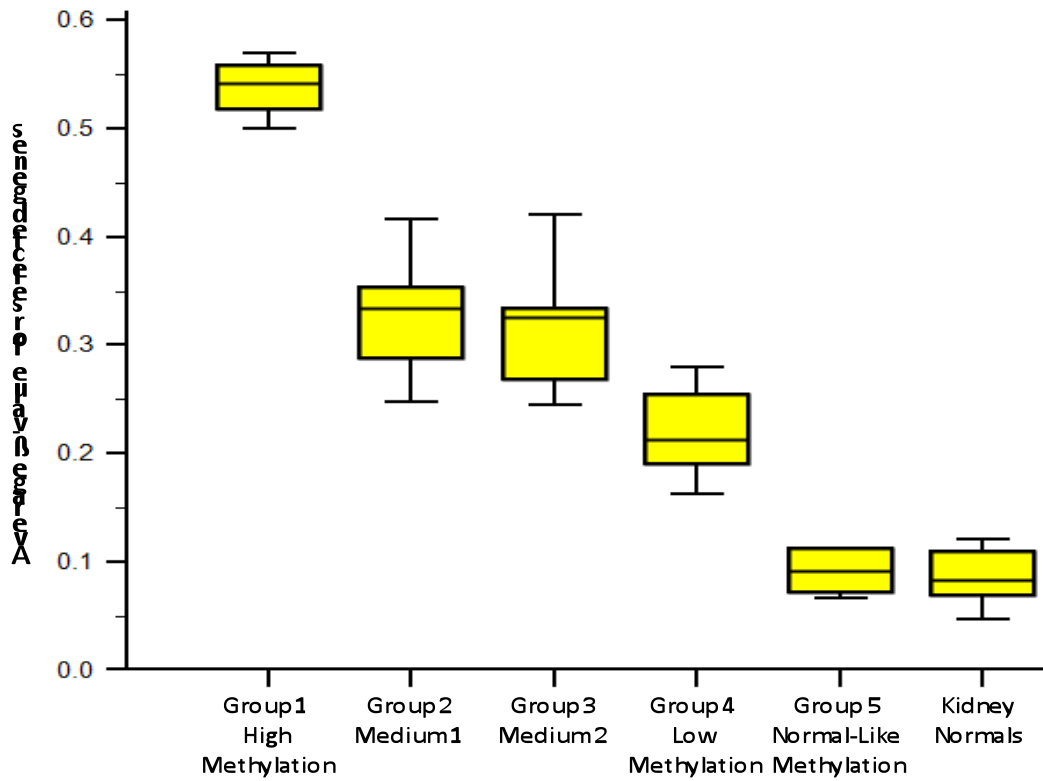

B

|                                   | Group 1<br>(High Methylation) | Group 2<br>(Medium 1) | Group 3<br>(Medium 2) | Group 4<br>(Low Methylation) | Group 5<br>(Normal-Like Methylation) | Normal Kidney |
|-----------------------------------|-------------------------------|-----------------------|-----------------------|------------------------------|--------------------------------------|---------------|
| Normal Kidney                     | >0.05                         | >0.05                 | >0.05                 | >0.05                        | n.s.                                 |               |
| Group 5 (Normal-Like Methylation) | >0.05                         | >0.05                 | >0.05                 | >0.05                        |                                      |               |
| Group 4 (Low Methylation)         | >0.05                         | >0.05                 | >0.05                 |                              |                                      |               |
| Group 3 (Medium 2)                | >0.05                         | n.s.                  |                       |                              |                                      |               |
| Group 2 (Medium 1)                | >0.05                         |                       |                       |                              |                                      |               |
| Group 1 (High Methylation)        |                               |                       |                       |                              |                                      |               |

Student-Newman-Keuls test for all pairwise comparisons

# Supplementary Figure 10

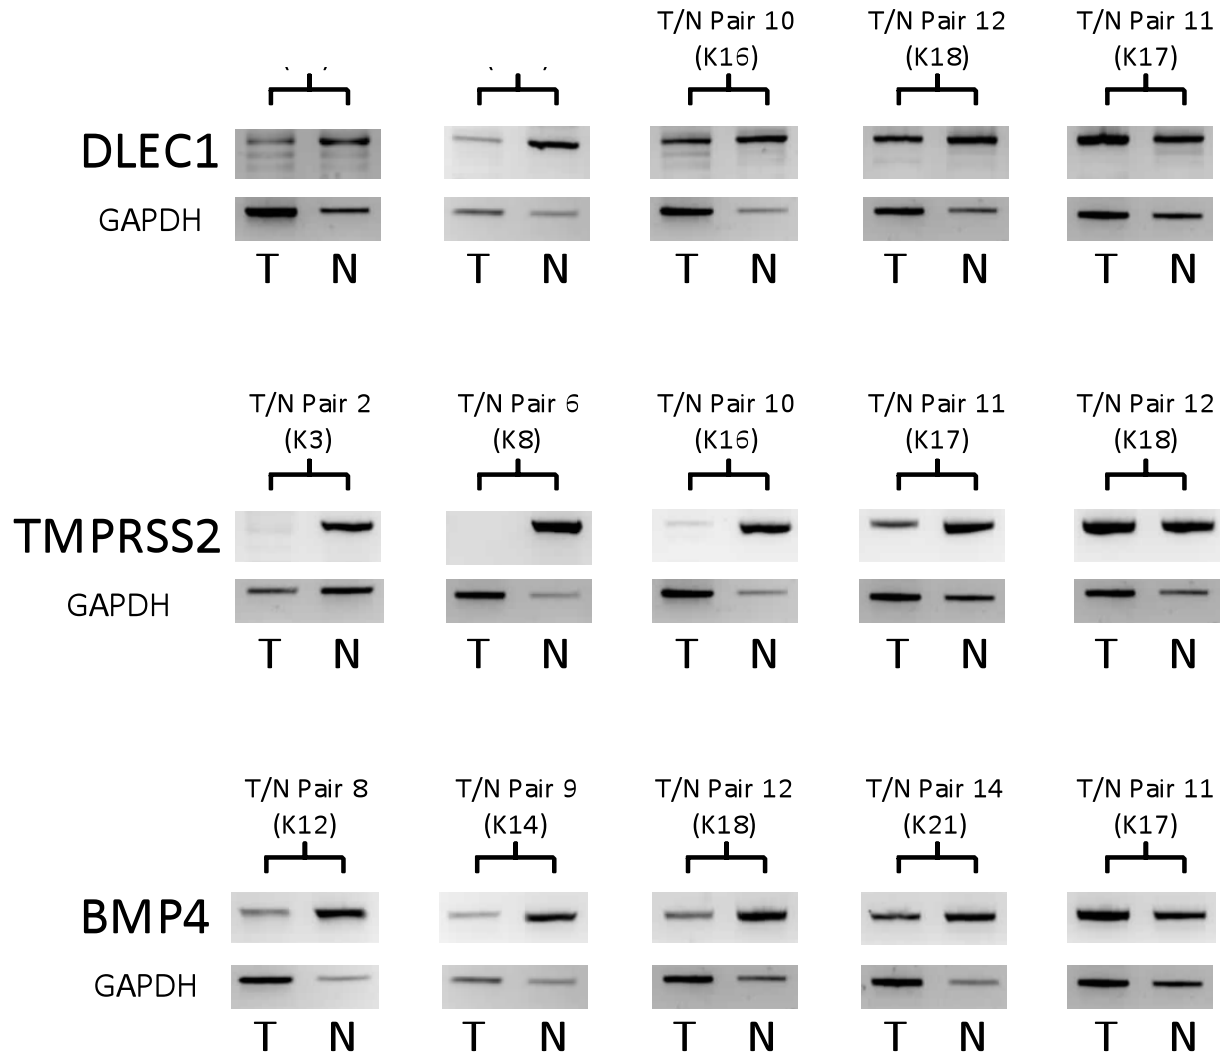



**Supplementary Table 2: Combined analysis Hypermethylated Gene Probes**

| Selected Probes | SYMBOL    | Target ID  | METH+<br>( $\beta \geq 0.4$ or Diff $\geq 0.3$ ) | CHR | PRODUCT                                                                | DISTANCE<br>TO TSS (bp) | CPG<br>ISLAND |
|-----------------|-----------|------------|--------------------------------------------------|-----|------------------------------------------------------------------------|-------------------------|---------------|
| 1               | FOXL1     | cg06995715 | 21/38 (55.2%)                                    | 16  | forkhead box L1                                                        | 260                     | TRUE          |
| 2               | SLC34A2   | cg19616230 | 19/38 (50.0%)                                    | 4   | solute carrier family 34 (sodium phosphate); member 2                  | 44                      | TRUE          |
| 3               | PENK      | cg04598121 | 19/38 (50.0%)                                    | 8   | proenkephalin                                                          | 84                      | TRUE          |
| 4               | TRIM58    | cg07533148 | 19/38 (50.0%)                                    | 1   | tripartite motif-containing 58                                         | 311                     | TRUE          |
| 5               | MFSO7     | cg24693053 | 17/38 (44.7%)                                    | 4   | hypothetical protein LOC84179                                          | 139                     | TRUE          |
| 6               | ZNF177    | cg09643544 | 16/38 (42.1%)                                    | 19  | zinc finger protein 177                                                | 0                       | TRUE          |
| 7               | ZNF454    | cg03355526 | 16/38 (42.1%)                                    | 5   | zinc finger protein 454                                                | 191                     | TRUE          |
| 8               | ICAM4     | cg21494776 | 16/38 (42.1%)                                    | 19  | intercellular adhesion molecule 4 isoform 1 precursor                  | 100                     | TRUE          |
| 9               | TM6SF1    | cg14696396 | 16/38 (42.1%)                                    | 15  | transmembrane 6 superfamily member 1                                   | 66                      | TRUE          |
| 10              | SOCS2     | cg04797323 | 15/38 (39.5%)                                    | 12  | suppressor of cytokine signaling-2                                     | 311                     | TRUE          |
| 11              | PCDHB15   | cg11368643 | 14/38 (36.8%)                                    | 5   | protocadherin beta 15 precursor                                        | 88                      | TRUE          |
| 12              | C1orf104  | cg22234962 | 14/38 (36.8%)                                    | 1   | hypothetical protein LOC284618                                         | 38                      | TRUE          |
| 13              | ZNF540    | cg03975694 | 14/38 (36.8%)                                    | 19  | zinc finger protein 540                                                | 164                     | TRUE          |
| 14              | SLC15A3   | cg21992250 | 14/38 (36.8%)                                    | 11  | solute carrier family 15; member 3                                     | 548                     | TRUE          |
| 15              | TLX3      | cg25720804 | 14/38 (36.8%)                                    | 5   | T-cell leukemia; homeobox 3                                            | 101                     | TRUE          |
| 16              | TNFRSF10C | cg27090216 | 14/38 (36.8%)                                    | 8   | tumor necrosis factor receptor superfamily; member 10c precursor       | 27                      | TRUE          |
| 17              | GPC2      | cg18691434 | 14/38 (36.8%)                                    | 7   | glypican 2                                                             | 435                     | TRUE          |
| 18              | TNFRSF10C | cg14015044 | 14/38 (36.8%)                                    | 8   | tumor necrosis factor receptor superfamily; member 10c precursor       | 185                     | TRUE          |
| 19              | HCG9      | cg04623837 | 13/38 (34.2%)                                    | 6   | hypothetical protein LOC10255                                          | 522                     | TRUE          |
| 20              | POU4F2    | cg24199834 | 13/38 (34.2%)                                    | 4   | POU domain; class 4; transcription factor 2                            | 38                      | TRUE          |
| 21              | FBN2      | cg27223047 | 13/38 (34.2%)                                    | 5   | fibillin 2 precursor                                                   | 1090                    | TRUE          |
| 22              | CCDC37    | cg00891278 | 13/38 (34.2%)                                    | 3   | hypothetical protein LOC348807                                         | 2                       | TRUE          |
| 23              | SOX17     | cg02919422 | 13/38 (34.2%)                                    | 8   | SRV-box 17                                                             | 49                      | TRUE          |
| 24              | IRX4      | cg03963198 | 13/38 (34.2%)                                    | 5   | iroquois homeobox protein 4                                            | 9                       | TRUE          |
| 25              | NOTCH3    | cg06650786 | 13/38 (34.2%)                                    | 19  | Notch homolog 3                                                        | 337                     | TRUE          |
| 26              | UTF1      | cg09053680 | 13/38 (34.2%)                                    | 10  | undifferentiated embryonic cell transcription factor 1                 | 336                     | TRUE          |
| 27              | HTR1E     | cg11990309 | 13/38 (34.2%)                                    | 6   | 5-hydroxytryptamine (serotonin) receptor 1E                            | 234                     | TRUE          |
| 28              | PRAC      | cg12374721 | 13/38 (34.2%)                                    | 17  | small nuclear protein PRAC                                             | 242                     | TRUE          |
| 29              | OXR1      | cg17176732 | 13/38 (34.2%)                                    | 8   | oxidation resistance 1                                                 | 238                     | TRUE          |
| 30              | FLT4      | cg00489401 | 13/38 (34.2%)                                    | 5   | fms-related tyrosine kinase 4 isoform 1                                | 691                     | TRUE          |
| 31              | RAMP1     | cg03270167 | 12/38 (31.6%)                                    | 2   | receptor activity-modifying protein 1 precursor                        | 729                     | TRUE          |
| 32              | HIST1H1A  | cg10146929 | 12/38 (31.6%)                                    | 6   | H1 histone family; member 1                                            | 77                      | TRUE          |
| 33              | PCDHGC4   | cg12145907 | 12/38 (31.6%)                                    | 5   | protocadherin gamma subfamily C; 4 isoform 1 precursor                 | 93                      | TRUE          |
| 34              | CA3       | cg18674980 | 12/38 (31.6%)                                    | 8   | carbonic anhydrase III                                                 | 123                     | TRUE          |
| 35              | OVOL1     | cg20909686 | 12/38 (31.6%)                                    | 11  | OVO-like 1 binding protein                                             | 487                     | TRUE          |
| 36              | CHODL     | cg24130010 | 12/38 (31.6%)                                    | 21  | chondrolectin precursor                                                | 26                      | TRUE          |
| 37              | WNT2      | cg01830294 | 12/38 (31.6%)                                    | 7   | wingless-type MMTV integration site family member 2 precursor          | 149                     | TRUE          |
| 38              | GCM2      | cg02844545 | 12/38 (31.6%)                                    | 6   | glial cells missing homolog 2                                          | 55                      | TRUE          |
| 39              | PRPH      | cg09595479 | 12/38 (31.6%)                                    | 12  | peripherin                                                             | 303                     | TRUE          |
| 40              | DRD5      | cg09936561 | 12/38 (31.6%)                                    | 4   | dopamine receptor D5                                                   | 20                      | TRUE          |
| 41              | MGC39545  | cg10261191 | 12/38 (31.6%)                                    | 11  | hypothetical protein LOC403312                                         | 366                     | TRUE          |
| 42              | TDRD5     | cg12277666 | 12/38 (31.6%)                                    | 1   | tudor domain containing 5                                              | 155                     | TRUE          |
| 43              | IRX2      | cg15433631 | 12/38 (31.6%)                                    | 5   | iroquois homeobox protein 2                                            | 228                     | TRUE          |
| 44              | ATP8A2    | cg18236477 | 12/38 (31.6%)                                    | 13  | ATPase; aminophospholipid transporter-like; Class I; type 8A; member 2 | 49                      | TRUE          |
| 45              | COL1A2    | cg18511007 | 12/38 (31.6%)                                    | 7   | alpha 2 type I collagen                                                | 51                      | TRUE          |
| 46              | ABCA3     | cg00949442 | 12/38 (31.6%)                                    | 16  | ATP-binding cassette; sub-family A member 3                            | 1234                    | TRUE          |
| 47              | COL1A2    | cg25300386 | 12/38 (31.6%)                                    | 7   | alpha 2 type I collagen                                                | 115                     | TRUE          |
| 48              | ZNF154    | cg08668790 | 12/38 (31.6%)                                    | 19  | zinc finger protein 154 (pHZ-92)                                       | 100                     | TRUE          |
| 49              | BNC1      | cg18952647 | 12/38 (31.6%)                                    | 15  | basonuclin 1                                                           | 276                     | TRUE          |
| 50              | ZNF154    | cg21790626 | 12/38 (31.6%)                                    | 19  | zinc finger protein 154 (pHZ-92)                                       | 68                      | TRUE          |
| 51              | FANCE     | cg03030757 | 11/38 (28.9%)                                    | 6   | Fanconi anemia; complementation group E                                | 616                     | TRUE          |
| 52              | CBX4      | cg04398978 | 11/38 (28.9%)                                    | 17  | chromobox homolog 4                                                    | 851                     | TRUE          |
| 53              | SHKBP1    | cg09381003 | 11/38 (28.9%)                                    | 19  | SH3KBP1 binding protein 1                                              | 476                     | TRUE          |
| 54              | TMPPRSS2  | cg24901042 | 11/38 (28.9%)                                    | 21  | transmembrane protease; serine 2                                       | 476                     | TRUE          |
| 55              | PCDHGB4   | cg00911351 | 11/38 (28.9%)                                    | 5   | protocadherin gamma subfamily B; 4 isoform 1 precursor                 | 197                     | TRUE          |
| 56              | CDKN2B    | cg10210238 | 11/38 (28.9%)                                    | 9   | cyclin-dependent kinase inhibitor 2B isoform 2                         |                         | TRUE          |
| 57              | CHX10     | cg11525285 | 11/38 (28.9%)                                    | 14  | ceh-10 homeo domain containing homolog                                 | 161                     | TRUE          |
| 58              | FLJ90650  | cg15489294 | 11/38 (28.9%)                                    | 5   | laeverin                                                               | 418                     | TRUE          |
| 59              | SPAG6     | cg25802093 | 11/38 (28.9%)                                    | 10  | sperm associated antigen 6 isoform 1                                   | 361                     | TRUE          |
| 60              | CD38      | cg26043257 | 11/38 (28.9%)                                    | 4   | CD38 antigen                                                           | 307                     | TRUE          |
| 61              | SLC27A6   | cg07103493 | 11/38 (28.9%)                                    | 5   | solute carrier family 27 (fatty acid transporter); member 6            | 22                      | TRUE          |
| 62              | MAP4K1    | cg00233307 | 11/38 (28.9%)                                    | 19  | mitogen-activated protein kinase kinase kinase kinase 1                | 520                     | TRUE          |
| 63              | AEBP1     | cg02126753 | 11/38 (28.9%)                                    | 7   | adipocyte enhancer binding protein 1 precursor                         | 38                      | TRUE          |
| 64              | GSTP1     | cg04920951 | 11/38 (28.9%)                                    | 11  | glutathione transferase                                                |                         | TRUE          |
| 65              | ACTL6B    | cg08572611 | 11/38 (28.9%)                                    | 7   | actin-like 6B                                                          | 136                     | TRUE          |
| 66              | UNQ9433   | cg17162024 | 11/38 (28.9%)                                    | 8   | hypothetical protein LOC389658                                         | 433                     | TRUE          |
| 67              | FBXO39    | cg20723355 | 11/38 (28.9%)                                    | 17  | F-box protein 39                                                       | 25                      | TRUE          |
| 68              | TLX3      | cg25942450 | 11/38 (28.9%)                                    | 5   | T-cell leukemia; homeobox 3                                            | 37                      | TRUE          |
| 69              | ZFP42     | cg06274159 | 11/38 (28.9%)                                    | 4   | zinc finger protein 42                                                 | 58                      | TRUE          |
| 70              | ZFP41     | cg12680609 | 11/38 (28.9%)                                    | 8   | zinc finger protein 41 homolog                                         | 609                     | TRUE          |
| 71              | HLF       | cg04219321 | 10/38 (26.3%)                                    | 17  | hepatic leukemia factor                                                | 712                     | TRUE          |
| 72              | CAB39L    | cg15207619 | 10/38 (26.3%)                                    | 13  | calcium binding protein 39-like isoform 2                              | 144                     | FALSE         |
| 73              | HIST1H4H  | cg15599064 | 10/38 (26.3%)                                    | 6   | H4 histone family; member H                                            | 72                      | TRUE          |
| 74              | COL5A2    | cg22774472 | 10/38 (26.3%)                                    | 2   | alpha 2 type V collagen preproprotein                                  | 148                     | FALSE         |
| 75              | RBP1      | cg23363832 | 10/38 (26.3%)                                    | 3   | retinol binding protein 1; cellular                                    |                         | TRUE          |

| Selected Probes | SYMBOL    | Target ID  | METH+<br>( $\beta \geq 0.4$ or $\text{Diff} \geq 0.3$ ) | CHR | PRODUCT                                                                                        | DISTANCE<br>TO TSS (bp) | CPG<br>ISLAND |
|-----------------|-----------|------------|---------------------------------------------------------|-----|------------------------------------------------------------------------------------------------|-------------------------|---------------|
| 76              | DLEC1     | cg23881725 | 10/38 (26.3%)                                           | 3   | deleted in lung and esophageal cancer 1 isoform DLEC1-L1                                       | 54                      | TRUE          |
| 77              | GAS6      | cg26420196 | 10/38 (26.3%)                                           | 13  | growth arrest-specific 6                                                                       | 964                     | TRUE          |
| 78              | GATA4     | cg09626984 | 10/38 (26.3%)                                           | 8   | GATA binding protein 4                                                                         |                         | TRUE          |
| 79              | SLC6A3    | cg13202751 | 10/38 (26.3%)                                           | 5   | solute carrier family 6 (neurotransmitter transporter; dopamine); member 3                     | 898                     | TRUE          |
| 80              | PITX2     | cg14056644 | 10/38 (26.3%)                                           | 4   | paired-like homeodomain transcription factor 2 isoform b                                       | 597                     | TRUE          |
| 81              | SCARF2    | cg14785479 | 10/38 (26.3%)                                           | 22  | scavenger receptor class F; member 2 isoform 2                                                 | 389                     | TRUE          |
| 82              | BIK       | cg17179881 | 10/38 (26.3%)                                           | 22  | BCL2-interacting killer                                                                        | 908                     | TRUE          |
| 83              | HIST1H4L  | cg17651821 | 10/38 (26.3%)                                           | 6   | H4 histone family; member K                                                                    | 394                     | FALSE         |
| 84              | CACNA1G   | cg18454685 | 10/38 (26.3%)                                           | 17  | voltage-dependent calcium channel alpha 1G subunit isoform 1                                   | 790                     | TRUE          |
| 85              | BCAN      | cg21475402 | 10/38 (26.3%)                                           | 1   | brevican isoform 2                                                                             | 400                     | TRUE          |
| 86              | FLJ90650  | cg25044651 | 10/38 (26.3%)                                           | 5   | laeverin                                                                                       | 449                     | TRUE          |
| 87              | FBN2      | cg25084878 | 10/38 (26.3%)                                           | 5   | fibrillin 2 precursor                                                                          | 24                      | TRUE          |
| 88              | SALL3     | cg15191648 | 10/38 (26.3%)                                           | 18  | sal-like 3                                                                                     | 13                      | TRUE          |
| 89              | GRM6      | cg14859460 | 10/38 (26.3%)                                           | 5   | glutamate receptor; metabotropic 6 precursor                                                   | 120                     | TRUE          |
| 90              | SLC5A7    | cg16232126 | 10/38 (26.3%)                                           | 2   | solute carrier family 5 (choline transporter); member 7                                        | 10                      | TRUE          |
| 91              | SOCS2     | cg23412850 | 10/38 (26.3%)                                           | 12  | suppressor of cytokine signaling-2                                                             |                         | TRUE          |
| 92              | GAS7      | cg22471346 | 10/38 (26.3%)                                           | 17  | growth arrest-specific 7 isoform a                                                             | 395                     | TRUE          |
| 93              | NEF3      | cg23290344 | 10/38 (26.3%)                                           | 8   | neurofilament 3 (150kDa medium)                                                                | 159                     | TRUE          |
| 94              | LRFN4     | cg20358834 | 10/38 (26.3%)                                           | 11  | leucine rich repeat and fibronectin type III domain containing 4                               | 717                     | TRUE          |
| 95              | RAB37     | cg12448933 | 10/38 (26.3%)                                           | 17  | RAB37; member RAS oncogene family isoform 1                                                    | 108                     | TRUE          |
| 96              | NEUROG1   | cg14958635 | 10/38 (26.3%)                                           | 5   | neurogenin 1                                                                                   |                         | TRUE          |
| 97              | INA       | cg25764191 | 10/38 (26.3%)                                           | 10  | internexin neuronal intermediate filament protein; alpha                                       | 295                     | TRUE          |
| 98              | CPD       | cg07156669 | 9/38 (23.7%)                                            | 17  | carboxypeptidase D precursor                                                                   | 739                     | FALSE         |
| 99              | ANGPT1    | cg09396217 | 9/38 (23.7%)                                            | 8   | angiopoietin 1                                                                                 | 32                      | FALSE         |
| 100             | ATP1A1    | cg09580336 | 9/38 (23.7%)                                            | 1   | Na+/K+ -ATPase alpha 1 subunit isoform a proprotein                                            | 714                     | TRUE          |
| 101             | TAL1      | cg19797376 | 9/38 (23.7%)                                            | 1   | T-cell acute lymphocytic leukemia 1                                                            | 32                      | TRUE          |
| 102             | FOXJ1     | cg24164563 | 9/38 (23.7%)                                            | 17  | forkhead box J1                                                                                | 171                     | TRUE          |
| 103             | SCUBE2    | cg01081263 | 9/38 (23.7%)                                            | 11  | CEGP1 protein                                                                                  | 684                     | TRUE          |
| 104             | TNFRSF10C | cg01407244 | 9/38 (23.7%)                                            | 8   | tumor necrosis factor receptor superfamily; member 10c precursor                               |                         | TRUE          |
| 105             | UTF1      | cg03755123 | 9/38 (23.7%)                                            | 10  | undifferentiated embryonic cell transcription factor 1                                         | 270                     | TRUE          |
| 106             | CYP26B1   | cg04884908 | 9/38 (23.7%)                                            | 2   | cytochrome P450; family 26; subfamily b; polypeptide 1                                         | 123                     | TRUE          |
| 107             | KCNS2     | cg05373457 | 9/38 (23.7%)                                            | 8   | potassium voltage-gated channel; delayed-rectifier; subfamily S; member 2                      | 698                     | TRUE          |
| 108             | HTR7      | cg06291867 | 9/38 (23.7%)                                            | 10  | 5-hydroxytryptamine receptor 7 isoform d                                                       | 509                     | TRUE          |
| 109             | MLLT11    | cg07139440 | 9/38 (23.7%)                                            | 1   | MLLT11 protein                                                                                 | 1170                    | FALSE         |
| 110             | DSCR6     | cg13460409 | 9/38 (23.7%)                                            | 21  | Down syndrome critical region protein 6                                                        | 707                     | TRUE          |
| 111             | DES       | cg18182399 | 9/38 (23.7%)                                            | 2   | desmin                                                                                         | 76                      | TRUE          |
| 112             | FOXE3     | cg18815943 | 9/38 (23.7%)                                            | 1   | forkhead box E3                                                                                | 570                     | TRUE          |
| 113             | PPYR1     | cg20491707 | 9/38 (23.7%)                                            | 10  | pancreatic polypeptide receptor 1                                                              | 251                     | TRUE          |
| 114             | HIST1H4K  | cg00634577 | 9/38 (23.7%)                                            | 6   | H4 histone family; member D                                                                    | 45                      | TRUE          |
| 115             | DGKE      | cg01344452 | 9/38 (23.7%)                                            | 17  | diacylglycerol kinase epsilon                                                                  | 590                     | TRUE          |
| 116             | SST       | cg02164046 | 9/38 (23.7%)                                            | 3   | somatostatin preproprotein                                                                     | 53                      | TRUE          |
| 117             | HIST1H4J  | cg11037148 | 9/38 (23.7%)                                            | 6   | H4 histone family; member E                                                                    | 44                      | TRUE          |
| 118             | CNTNAP2   | cg16254309 | 9/38 (23.7%)                                            | 7   | cell recognition molecule Caspr2 precursor                                                     | 323                     | TRUE          |
| 119             | RIMS4     | cg19332710 | 9/38 (23.7%)                                            | 20  | regulating synaptic membrane exocytosis 4                                                      | 47                      | TRUE          |
| 120             | FGF4      | cg19831575 | 9/38 (23.7%)                                            | 11  | fibroblast growth factor 4 precursor                                                           | 81                      | TRUE          |
| 121             | RG57      | cg21303386 | 9/38 (23.7%)                                            | 1   | regulator of G-protein signalling 7                                                            | 167                     | TRUE          |
| 122             | ZNF454    | cg23037403 | 9/38 (23.7%)                                            | 5   | zinc finger protein 454                                                                        | 41                      | TRUE          |
| 123             | BMP4      | cg14310034 | 9/38 (23.7%)                                            | 14  | bone morphogenetic protein 4 preproprotein                                                     | 179                     | TRUE          |
| 124             | OSTbeta   | cg16029760 | 9/38 (23.7%)                                            | 15  | organic solute transporter beta                                                                | 411                     | TRUE          |
| 125             | FAM3B     | cg03158400 | 9/38 (23.7%)                                            | 21  | family with sequence similarity 3; member B isoform a                                          | 225                     | TRUE          |
| 126             | ZNF560    | cg05221167 | 9/38 (23.7%)                                            | 19  | zinc finger protein 560                                                                        | 118                     | TRUE          |
| 127             | GRIK1     | cg21816539 | 9/38 (23.7%)                                            | 21  | glutamate receptor; ionotropic; kainate 1 isoform 1 precursor                                  | 46                      | TRUE          |
| 128             | SPDY1     | cg04786857 | 9/38 (23.7%)                                            | 2   | speedy homolog 1 isoform 1                                                                     | 180                     | TRUE          |
| 129             | FNDC4     | cg17918501 | 9/38 (23.7%)                                            | 2   | fibronectin type III domain containing 4                                                       | 377                     | TRUE          |
| 130             | TWIST1    | cg20052718 | 9/38 (23.7%)                                            | 7   | twist                                                                                          |                         | TRUE          |
| 131             | GDF7      | cg05899618 | 8/38 (21.1%)                                            | 2   | growth differentiation factor 7 preproprotein                                                  | 577                     | TRUE          |
| 132             | SCG3      | cg26929536 | 8/38 (21.1%)                                            | 15  | secretogranin III                                                                              | 90                      | FALSE         |
| 133             | LOC389458 | cg01870826 | 8/38 (21.1%)                                            | 7   | hypothetical protein LOC389458                                                                 | 143                     | TRUE          |
| 134             | FBXO39    | cg02613386 | 8/38 (21.1%)                                            | 17  | F-box protein 39                                                                               | 39                      | TRUE          |
| 135             | NTSR1     | cg03567830 | 8/38 (21.1%)                                            | 20  | neurotensin receptor 1                                                                         | 318                     | TRUE          |
| 136             | C20orf100 | cg04369341 | 8/38 (21.1%)                                            | 20  | chromosome 20 open reading frame 100                                                           | 215                     | TRUE          |
| 137             | GPR150    | cg04597449 | 8/38 (21.1%)                                            | 5   | G protein-coupled receptor 150                                                                 | 405                     | TRUE          |
| 138             | DISP2     | cg06595693 | 8/38 (21.1%)                                            | 15  | dispatched B                                                                                   | 445                     | TRUE          |
| 139             | CTNND2    | cg10331779 | 8/38 (21.1%)                                            | 5   | catenin (cadherin-associated protein); delta 2 (neural plakophilin-related arm-repeat protein) | 701                     | TRUE          |
| 140             | CLEC11A   | cg13152535 | 8/38 (21.1%)                                            | 19  | stem cell growth factor precursor                                                              | 48                      | TRUE          |
| 141             | PLXDC1    | cg14601284 | 8/38 (21.1%)                                            | 17  | plexin domain containing 1 precursor                                                           | 506                     | FALSE         |
| 142             | CPNE7     | cg16444968 | 8/38 (21.1%)                                            | 16  | copine 7 isoform b                                                                             | 453                     | TRUE          |
| 143             | ZNF83     | cg17132967 | 8/38 (21.1%)                                            | 19  | zinc finger protein 83 (HPF1)                                                                  | 666                     | TRUE          |
| 144             | PRR3      | cg21264055 | 8/38 (21.1%)                                            | 6   | proline-rich protein 3                                                                         | 1421                    | TRUE          |
| 145             | SLC8A2    | cg22123464 | 8/38 (21.1%)                                            | 19  | solute carrier family 8 member 2                                                               | 221                     | FALSE         |
| 146             | TCF15     | cg22449114 | 8/38 (21.1%)                                            | 20  | basic helix-loop-helix transcription factor 15                                                 | 667                     | TRUE          |
| 147             | SLC9A3    | cg23061578 | 8/38 (21.1%)                                            | 5   | solute carrier family 9 (sodium/hydrogen exchanger); isoform 3                                 | 494                     | TRUE          |
| 148             | GBX2      | cg23095584 | 8/38 (21.1%)                                            | 2   | gastrulation brain homeo box 2                                                                 | 1052                    | TRUE          |
| 149             | SLC2A14   | cg05521696 | 8/38 (21.1%)                                            | 12  | glucose transporter 14                                                                         | 0                       | TRUE          |
| 150             | TBX20     | cg02008154 | 8/38 (21.1%)                                            | 7   | T-box transcription factor TBX20                                                               | 295                     | TRUE          |

| Selected Probes | SYMBOL   | Target ID  | METH+<br>( $\beta \geq 0.4$ or $\text{Diff} \geq 0.3$ ) | CHR | PRODUCT                                                            | DISTANCE<br>TO TSS (bp) | CPG<br>ISLAND |
|-----------------|----------|------------|---------------------------------------------------------|-----|--------------------------------------------------------------------|-------------------------|---------------|
| 151             | SLC6A2   | cg04490714 | 8/38 (21.1%)                                            | 16  | solute carrier family 6 member 2                                   | 8                       | TRUE          |
| 152             | TCFL5    | cg10729531 | 8/38 (21.1%)                                            | 20  | transcription factor-like 5 protein                                | 446                     | TRUE          |
| 153             | GUCY2D   | cg25465406 | 8/38 (21.1%)                                            | 17  | guanylate cyclase 2D; membrane (retina-specific)                   | 110                     | TRUE          |
| 154             | ATP6V0C  | cg05483509 | 8/38 (21.1%)                                            | 16  | ATPase; H+ transporting; lysosomal; V0 subunit c                   | 518                     | TRUE          |
| 155             | GNB4     | cg17483510 | 8/38 (21.1%)                                            | 3   | guanine nucleotide-binding protein; beta-4 subunit                 | 694                     | TRUE          |
| 156             | ACCN4    | cg19210770 | 8/38 (21.1%)                                            | 2   | amiloride-sensitive cation channel 4 isoform 1                     | 39                      | TRUE          |
| 157             | KIAA1822 | cg02867079 | 8/38 (21.1%)                                            | 14  | KIAA1822 protein                                                   | 211                     | TRUE          |
| 158             | RASGRF2  | cg09952204 | 8/38 (21.1%)                                            | 5   | Ras protein-specific guanine nucleotide-releasing factor 2         | 106                     | TRUE          |
| 159             | KLK10    | cg11846956 | 8/38 (21.1%)                                            | 19  | kallikrein 10 precursor                                            |                         | TRUE          |
| 160             | NTRK3    | cg14384532 | 8/38 (21.1%)                                            | 15  | neurotrophic tyrosine kinase; receptor; type 3 isoform c precursor | 963                     | TRUE          |
| 161             | FLRT2    | cg17410236 | 8/38 (21.1%)                                            | 14  | fibronectin leucine rich transmembrane protein 2                   | 7                       | TRUE          |
| 162             | GATA4    | cg25216696 | 8/38 (21.1%)                                            | 8   | GATA binding protein 4                                             |                         | TRUE          |
| 163             | OLFM2    | cg00208967 | 7/38 (18.4%)                                            | 19  | olfactomedin 2                                                     | 854                     | TRUE          |
| 164             | TUBB6    | cg07307078 | 7/38 (18.4%)                                            | 18  | tubulin; beta 6                                                    | 627                     | TRUE          |
| 165             | CHD5     | cg08080029 | 7/38 (18.4%)                                            | 1   | chromodomain helicase DNA binding protein 5                        | 213                     | TRUE          |
| 166             | TGIF2    | cg12556134 | 7/38 (18.4%)                                            | 20  | TGFB-induced factor 2                                              | 413                     | TRUE          |
| 167             | PAX9     | cg00509670 | 7/38 (18.4%)                                            | 14  | paired box gene 9                                                  | 592                     | TRUE          |
| 168             | GALR1    | cg00662556 | 7/38 (18.4%)                                            | 18  | galanin receptor 1                                                 |                         | TRUE          |
| 169             | HAND2    | cg01580681 | 7/38 (18.4%)                                            | 4   | basic helix-loop-helix transcription factor HAND2                  | 578                     | TRUE          |
| 170             | MAFB     | cg02497758 | 7/38 (18.4%)                                            | 20  | transcription factor MAFB                                          | 682                     | TRUE          |
| 171             | KCNC3    | cg06572160 | 7/38 (18.4%)                                            | 19  | Shaw-related voltage-gated potassium channel protein 3             | 733                     | TRUE          |
| 172             | IGF2BP1  | cg06638433 | 7/38 (18.4%)                                            | 17  | insulin-like growth factor 2 mRNA binding protein 1                | 401                     | TRUE          |
| 173             | CDKN2A   | cg07752420 | 7/38 (18.4%)                                            | 9   | cyclin-dependent kinase inhibitor 2A isoform 3                     |                         | TRUE          |
| 174             | ST3GAL4  | cg08203715 | 7/38 (18.4%)                                            | 11  | ST3 beta-galactoside alpha-2,3-sialyltransferase 4                 | 58                      | TRUE          |
| 175             | DSC3     | cg11832722 | 7/38 (18.4%)                                            | 18  | desmocollin 3 isoform Dsc3a preproprotein                          | 371                     | TRUE          |
| 176             | KIAA0676 | cg12080675 | 7/38 (18.4%)                                            | 5   | hypothetical protein LOC23061 isoform a                            | 365                     | TRUE          |
| 177             | TEKT1    | cg12685753 | 7/38 (18.4%)                                            | 17  | tektin 1                                                           | 479                     | TRUE          |
| 178             | INSRR    | cg12995941 | 7/38 (18.4%)                                            | 1   | insulin receptor-related receptor precursor                        | 711                     | TRUE          |
| 179             | OVOL1    | cg13496736 | 7/38 (18.4%)                                            | 11  | OVO-like 1 binding protein                                         | 326                     | TRUE          |
| 180             | PRKAR1B  | cg13577076 | 7/38 (18.4%)                                            | 7   | protein kinase; cAMP-dependent; regulatory; type I; beta           | 323                     | TRUE          |
| 181             | SLC18A3  | cg14008883 | 7/38 (18.4%)                                            | 10  | solute carrier family 18 (vesicular acetylcholine); member 3       | 564                     | TRUE          |
| 182             | ZFP42    | cg14189571 | 7/38 (18.4%)                                            | 4   | zinc finger protein 42                                             | 18                      | TRUE          |
| 183             | LOC63928 | cg15309006 | 7/38 (18.4%)                                            | 16  | hepatocellular carcinoma antigen gene 520                          | 168                     | TRUE          |
| 184             | DLX1     | cg16652259 | 7/38 (18.4%)                                            | 2   | distal-less homeo box 1                                            | 24                      | TRUE          |
| 185             | ITGA8    | cg16902509 | 7/38 (18.4%)                                            | 10  | integrin; alpha 8                                                  | 458                     | TRUE          |
| 186             | MYOD1    | cg18555440 | 7/38 (18.4%)                                            | 11  | myogenic differentiation 1                                         | 528                     | TRUE          |
| 187             | GPR124   | cg20011352 | 7/38 (18.4%)                                            | 8   | G protein-coupled receptor 124                                     | 495                     | TRUE          |
| 188             | PCDH8    | cg20366906 | 7/38 (18.4%)                                            | 13  | protocadherin 8 isoform 2 precursor                                | 393                     | TRUE          |
| 189             | UQCRH    | cg21576698 | 7/38 (18.4%)                                            | 1   | ubiquinol-cytochrome c reductase hinge protein                     | 1437                    | TRUE          |
| 190             | FGF23    | cg23219570 | 7/38 (18.4%)                                            | 12  | fibroblast growth factor 23 precursor                              | 1                       | FALSE         |
| 191             | STMN2    | cg23326689 | 7/38 (18.4%)                                            | 8   | superiorcervical ganglia; neural specific 10                       | 81                      | TRUE          |
| 192             | FLJ90166 | cg23418591 | 7/38 (18.4%)                                            | 20  | hypothetical protein LOC164284                                     | 368                     | TRUE          |
| 193             | HSPA2    | cg24642523 | 7/38 (18.4%)                                            | 14  | heat shock 70kDa protein 2                                         |                         | TRUE          |
| 194             | PTGDR    | cg24989962 | 7/38 (18.4%)                                            | 14  | prostaglandin D2 receptor                                          | 145                     | TRUE          |
| 195             | C14orf39 | cg27398547 | 7/38 (18.4%)                                            | 14  | hypothetical protein LOC317761                                     | 11                      | TRUE          |
| 196             | BSG      | cg01532103 | 7/38 (18.4%)                                            | 19  | basigin isoform 1                                                  | 218                     | TRUE          |
| 197             | HMGA1    | cg03020951 | 7/38 (18.4%)                                            | 6   | high mobility group AT-hook 1 isoform a                            | 763                     | TRUE          |
| 198             | GLRA1    | cg14319409 | 7/38 (18.4%)                                            | 5   | glycine receptor; alpha 1                                          | 6                       | TRUE          |
| 199             | WBSCR17  | cg01366419 | 7/38 (18.4%)                                            | 7   | UDP-GalNAc:polypeptide N-acetylgalactosaminyltransferase-like 3    | 698                     | TRUE          |
| 200             | HOXA6    | cg04265576 | 7/38 (18.4%)                                            | 7   | homeobox A6                                                        | 4                       | TRUE          |
| 201             | MDF1     | cg05345286 | 7/38 (18.4%)                                            | 6   | MyoD family inhibitor                                              | 388                     | TRUE          |
| 202             | KCNC4    | cg05675373 | 7/38 (18.4%)                                            | 1   | Shaw-related voltage-gated potassium channel protein 4 isoform a   | 280                     | TRUE          |
| 203             | SLITRK1  | cg07104706 | 7/38 (18.4%)                                            | 13  | slit and trk like 1 protein                                        | 401                     | TRUE          |
| 204             | PAX7     | cg07536847 | 7/38 (18.4%)                                            | 1   | paired box gene 7 isoform 1                                        | 268                     | TRUE          |
| 205             | HBQ1     | cg07703401 | 7/38 (18.4%)                                            | 16  | theta 1 globin                                                     | 6                       | TRUE          |
| 206             | POU4F1   | cg08097882 | 7/38 (18.4%)                                            | 13  | POU domain; class 4; transcription factor 1                        | 179                     | TRUE          |
| 207             | SLC26A5  | cg09492887 | 7/38 (18.4%)                                            | 7   | prestin isoform a                                                  | 620                     | TRUE          |
| 208             | CYYR1    | cg10238818 | 7/38 (18.4%)                                            | 21  | cysteine and tyrosine-rich 1 protein precursor                     | 27                      | TRUE          |
| 209             | FAM78A   | cg12998491 | 7/38 (18.4%)                                            | 9   | hypothetical protein LOC286336                                     | 625                     | TRUE          |
| 210             | ACTA1    | cg13547644 | 7/38 (18.4%)                                            | 1   | alpha 1 actin precursor                                            | 235                     | TRUE          |
| 211             | PITX3    | cg14681055 | 7/38 (18.4%)                                            | 10  | paired-like homeodomain transcription factor 3                     | 30                      | TRUE          |
| 212             | COMP     | cg15784332 | 7/38 (18.4%)                                            | 19  | cartilage oligomeric matrix protein precursor                      | 58                      | TRUE          |
| 213             | PHOX2A   | cg18722841 | 7/38 (18.4%)                                            | 11  | paired-like homeobox 2a                                            | 222                     | TRUE          |
| 214             | SLC30A3  | cg19461344 | 7/38 (18.4%)                                            | 2   | solute carrier family 30 (zinc transporter); member 3              | 38                      | TRUE          |
| 215             | SFRP2    | cg23207990 | 7/38 (18.4%)                                            | 4   | secreted frizzled-related protein 2 precursor                      |                         | TRUE          |
| 216             | EDNRB    | cg23316360 | 7/38 (18.4%)                                            | 13  | endothelin receptor type B isoform 2                               |                         | TRUE          |
| 217             | ZFP28    | cg23850212 | 7/38 (18.4%)                                            | 19  | zinc finger protein 28                                             | 460                     | TRUE          |
| 218             | TWIST1   | cg26312150 | 7/38 (18.4%)                                            | 7   | twist                                                              | 745                     | TRUE          |
| 219             | GSCL     | cg26599006 | 7/38 (18.4%)                                            | 22  | gooseoid-like                                                      | 425                     | TRUE          |
| 220             | OTOP3    | cg27243140 | 7/38 (18.4%)                                            | 17  | otopetrin 3                                                        | 233                     | TRUE          |

**Supplementary Table 3: Pathway Analysis of the Selected Hypermethylated Genes using DAVID and Ingenuity® Systems Pathway Analysis**

DAVID Functional Analysis

Cell-Cell Signalling

|       |             |        |             |       |       |
|-------|-------------|--------|-------------|-------|-------|
| BMP4  | DRD5        | FAM3B  | FGF4        | GATA4 | GLRA1 |
| GRIK1 | <u>GRM6</u> | HTR1E  | <u>HTR7</u> | KCNC4 | NTSR1 |
| PCDH8 | SLC5A7      | SLC6A2 | SST         | WNT2  |       |

Regulation of Cell Proliferation

|         |              |       |              |             |               |
|---------|--------------|-------|--------------|-------------|---------------|
| ATP8A2  | BMP4         | BNC1  | CD38         | CDKN2A      | <u>CDKN2B</u> |
| CLEC11A | <u>DLEC1</u> | EDNRB | FGF4         | <u>FLT4</u> | FOXE3         |
| FOXJ1   | GATA4        | SST   | <u>TCFL5</u> | WNT2        |               |

Regulation of Cell Death

|        |         |              |      |              |      |
|--------|---------|--------------|------|--------------|------|
| BIK    | BMP4    | <u>CBX4</u>  | CD38 | CDKN2A       | COMP |
| DLX1   | EDNRB   | FGF4         | GCM2 | <u>GSTP1</u> | PAX7 |
| POU4F1 | RASGRF2 | <u>SOCS2</u> | SST  |              |      |

Cell-Cell Adhesions

|              |             |               |       |        |         |
|--------------|-------------|---------------|-------|--------|---------|
| <u>AEBP1</u> | <u>BCAN</u> | CNTNAP2       | COMP  | CTNND2 | DSC3    |
| FGF4         | FLRT2       | <u>ICAM4</u>  | ITGA8 | PCDH8  | PCDHB15 |
| PCDHGB4      | PCDHGC4     | <u>SCARF2</u> |       |        |         |

Angiogenesis/Blood Vessel Development

|        |       |               |      |       |  |
|--------|-------|---------------|------|-------|--|
| ANGPT1 | BMP4  | <u>COL1A2</u> | GBX2 | HAND2 |  |
| PLXDC1 | SOX17 | TBX20         |      |       |  |

EGF Genes

|             |         |      |               |        |  |
|-------------|---------|------|---------------|--------|--|
| <u>BCAN</u> | CNTNAP2 | GAS6 | <u>NOTCH3</u> | SCUBE2 |  |
|-------------|---------|------|---------------|--------|--|

Tumour Suppressor

|        |               |              |       |      |  |
|--------|---------------|--------------|-------|------|--|
| CDKN2A | <u>CDKN2B</u> | <u>DLEC1</u> | KLK10 | MAFB |  |
|--------|---------------|--------------|-------|------|--|

Cadherins

|       |         |         |         |  |  |
|-------|---------|---------|---------|--|--|
| PCDH8 | PCDHB15 | PCDHGB4 | PCDHGC4 |  |  |
|-------|---------|---------|---------|--|--|

Ingenuity® Systems Pathway Analysis

TGF-β Signalling Pathway

|      |               |      |      |       |  |
|------|---------------|------|------|-------|--|
| BMP4 | <u>CDKN2B</u> | COMP | GDF7 | PITX2 |  |
|------|---------------|------|------|-------|--|

Somatostatin Pathway

|      |        |     |  |  |  |
|------|--------|-----|--|--|--|
| GNB4 | GUCY2D | SST |  |  |  |
|------|--------|-----|--|--|--|

Supplementary Table 4: Methylation Analysis Selected Genes in COSMIC (<http://www.sanger.ac.uk/genetics/CGP/cosmic/>)

| Gene      | COSMIC Mutation Positive Samples |        | COSMIC Mutation Data                                                                                        |                                                                                        |                                                                                                                                                   |
|-----------|----------------------------------|--------|-------------------------------------------------------------------------------------------------------------|----------------------------------------------------------------------------------------|---------------------------------------------------------------------------------------------------------------------------------------------------|
|           | Kidney                           | Total  | Nucleotide Change                                                                                           | Amino Acid Change                                                                      | Cancer Type (frequency)                                                                                                                           |
| FOXL1     | 0/101                            | 0/180  | -                                                                                                           | -                                                                                      | -                                                                                                                                                 |
| SLC34A2   | 1/1                              | 2/46   | c.1665 G>C<br>c.770 G>C                                                                                     | p.L555L<br>p.G257A                                                                     | Kidney (1/1)<br>Ovarian (1/1)                                                                                                                     |
| TM6SF1    | 0/0                              | 1/45   | c.1049 C>T                                                                                                  | p.A350V                                                                                | Ovarian (1/1)                                                                                                                                     |
| COL1A2    | 0/0                              | 5/470  | c.2079 G>A<br>c.2527 G>A<br>c.2809 G>A<br>c.2813 G>A<br>c.688 C>T                                           | p.R693R<br>p.A843T<br>p.G937S<br>p.R938H<br>p.P230S                                    | Glioma (1/446)<br>Ovarian (1/2)<br>Ovarian (1/2)<br>Glioma (1/446)<br>Glioma (1/446)                                                              |
| SOCS2     | 0/101                            | 0/180  | -                                                                                                           | -                                                                                      | -                                                                                                                                                 |
| OVOL1     | 0/0                              | 1/44   | c.402 C>T                                                                                                   | p.N134N                                                                                | Glioma (1/22)                                                                                                                                     |
| ZNF154    | 0/0                              | 0/44   | -                                                                                                           | -                                                                                      | -                                                                                                                                                 |
| TNFRSF10C | 0/101                            | 0/605  | -                                                                                                           | -                                                                                      | -                                                                                                                                                 |
| TMPRSS2   | 0/101                            | 1/3700 | c.1254 C>T                                                                                                  | p.N418N                                                                                | Glioma (1/23)                                                                                                                                     |
| DLEC1     | 0/101                            | 0/180  | c.1052 C>G<br>c.2532 G>A<br>c.2595 C>T<br>c.2614 C>T<br>c.2651 G>A<br>c.3296 G>A<br>c.4035 G>A<br>c.643 G>A | p.P351R<br>p.S844S<br>p.A865A<br>p.R872C<br>p.R884Q<br>p.R1099H<br>p.S1345S<br>p.D215N | Breast (1/48)<br>Ovarian (1/2)<br>Glioma (1/22)<br>Glioma (1/22)<br>Pancreas (1/2)<br>Pancreas (1/2)<br>Ovarian (1/2)<br>Malignant Melanoma (1/1) |
| SST       | 0/0                              | 1/45   | c.73 G>A                                                                                                    | p.A25T                                                                                 | Pancreas (1/1)                                                                                                                                    |
| GNB4      | 0/101                            | 2/181  | c.320 C>T                                                                                                   | p.P107L                                                                                | Malignant Melanoma (2/6)                                                                                                                          |
| GUCY2D    | 0/27                             | 1/273  | c.1292 G>A                                                                                                  | p.G431D                                                                                | Malignant Melanoma (1/6)                                                                                                                          |



**Supplementary Table 5: Mutation and Cluster Data for 38 Sporadic Renal Cell Carcinoma Patients**

| Group                               | Tumour | Sex               | VHL Mutation                              | Methylation only<br>Average $\beta$ -value |
|-------------------------------------|--------|-------------------|-------------------------------------------|--------------------------------------------|
| Group 1<br>High Methylation<br>CIMP | K3     | M                 | No Mutation                               | 0.475                                      |
|                                     | K12    | M                 | No Mutation                               | 0.489                                      |
|                                     | K21    | F                 | c.349T>A, p.Trp117Arg, Exon 2             | 0.484                                      |
|                                     | K24    | M                 | c.493delG, Exon 3                         | 0.395                                      |
| Group 2<br>Medium 1                 | K1     | M                 | c.278 G>T, p.Gly93Val, Exon 1             | 0.299                                      |
|                                     | K5     | M                 | c.464-1G>A, Splice error, Exon 3          | 0.300                                      |
|                                     | K7     | M                 | c.233 A>G, p.Asp78Ser, Exon 1             | 0.354                                      |
|                                     | K9     | M                 | No Mutation                               | 0.325                                      |
|                                     | K11    | M                 | c.208 G>T, p.Glu70Stop, Exon 1            | 0.339                                      |
|                                     | K13    | F                 | c.464-6del474 (TTCCAGTGTATACTCTG), Exon 3 | 0.285                                      |
|                                     | K23    | M                 | No Mutation                               | 0.269                                      |
|                                     | K33    | M                 | c.444delT, Exon 2                         | 0.256                                      |
| K34                                 | M      | c.523delT, Exon 3 | 0.259                                     |                                            |
| Group 3<br>Medium 2                 | K14    | M                 | No Mutation                               | 0.268                                      |
|                                     | K15    | M                 | No Mutation                               | 0.227                                      |
|                                     | K16    | F                 | c.464-2_464-1insA, Exon 3                 | 0.248                                      |
|                                     | K20    | M                 | No Mutation                               | 0.334                                      |
|                                     | K27    | M                 | c.235del249 (CGCAGTCCGCGCGTC), Exon 1     | 0.291                                      |
|                                     | K35    | M                 | c.551T>C, p.Leu184Pro, Exon 3             | 0.252                                      |
|                                     | K36    | M                 | No Mutation                               | 0.259                                      |
|                                     | K37    | M                 | c.264G>C, Exon 1                          | 0.220                                      |
| K38                                 | F      | No Mutation       | 0.191                                     |                                            |
| Group 4<br>Low Methylation          | K2     | M                 | No Mutation                               | 0.250                                      |
|                                     | K8     | F                 | No Mutation                               | 0.258                                      |
|                                     | K10    | M                 | c.474A>T, p.Lys159Stop, Exon 3            | 0.161                                      |
|                                     | K19    | M                 | No Mutation                               | 0.170                                      |
|                                     | K28    | M                 | No Mutation                               | 0.201                                      |
|                                     | K29    | M                 | c.223insA, Exon 1                         | 0.175                                      |
|                                     | K31    | F                 | c.406T>G, p.Phe36Val, Exon 2              | 0.192                                      |
| K32                                 | F      | c.492insA, Exon 3 | 0.220                                     |                                            |
| Group 5 Normal-<br>Like Methylation | K6     | M                 | No Mutation                               | 0.109                                      |
|                                     | K17    | M                 | c.262 T>A, p.Trp88Arg, Exon 1             | 0.098                                      |
|                                     | K22    | M                 | No Mutation                               | 0.079                                      |
|                                     | K25    | F                 | c.256 C>A, p.Pro87Thr, Exon 1             | 0.128                                      |
|                                     | K26    | F                 | c.256 C>A, p.Pro86Thr, Exon 1             | 0.122                                      |
|                                     | K30    | F                 | c.397delA, Exon 2                         | 0.122                                      |
| Outliers                            | K4     | M                 | No Mutation                               | 0.216                                      |
|                                     | K18    | F                 | No Mutation                               | 0.184                                      |
